# Supplementary material
Source: publisher site journal article supplement (https://www.dovepress.com/article/357096)
Supplement: Supplementary file 1 [file get_supplementary_file.php]

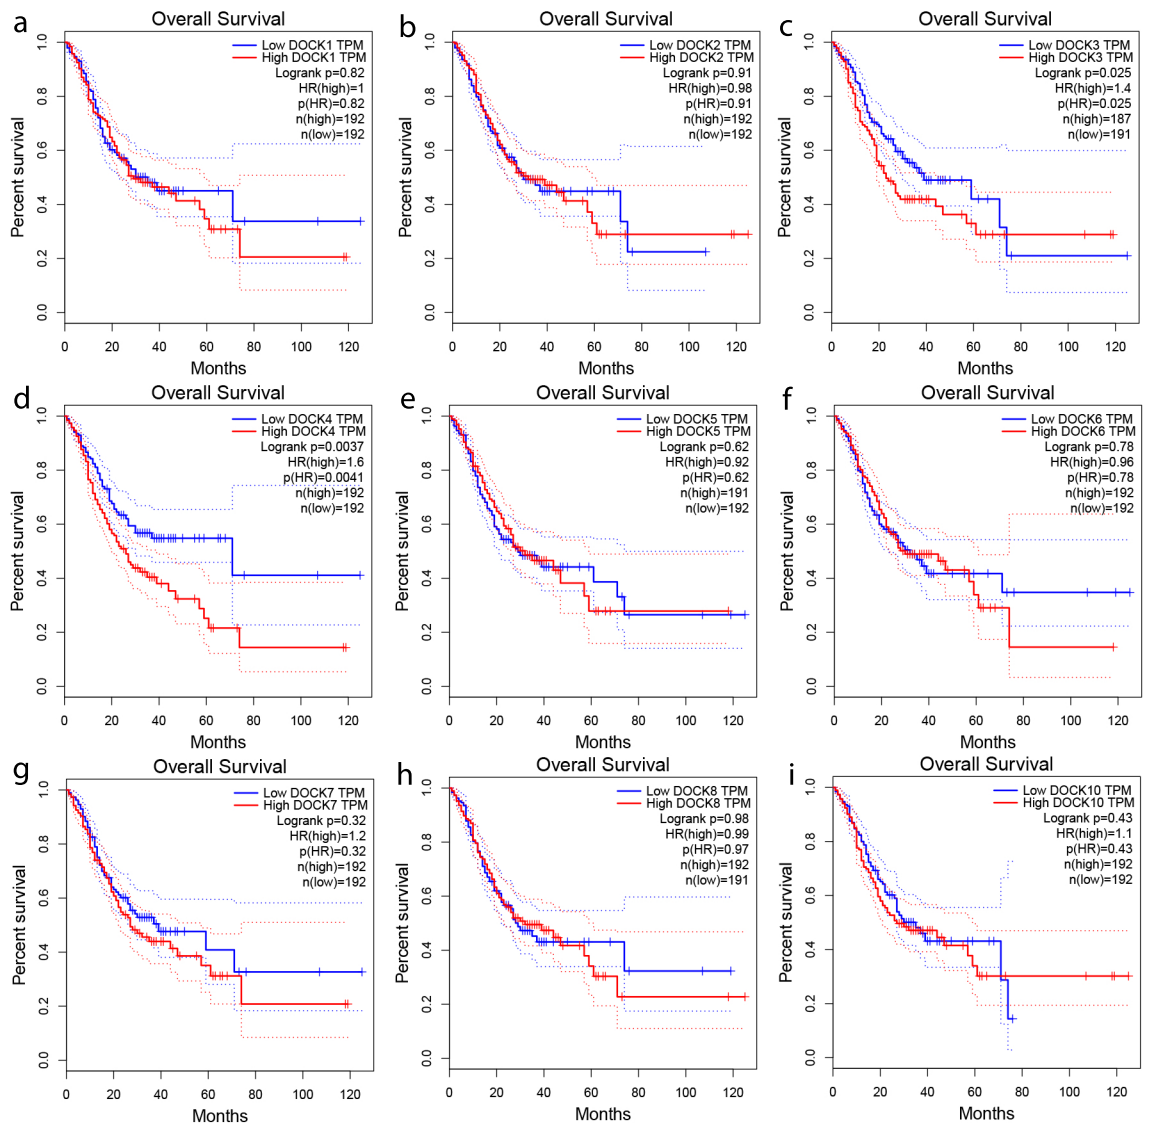

**Supplementary figure 1: Overall survival curves of patients with STAD according to DOCK proteins via GEPIA database. DOCK1 (a), DOCK2 (b), DOCK3 (c), DOCK4 (d), DOCK5 (e), DOCK6 (f), DOCK7 (g), DOCK8 (h), DOCK10 (i). HR, hazard ratio.**

Supplementary table 1 The alteration frequency of DOCK4 in stomach adenocarcinoma patients.

| <b>Cancer Study</b>                                     | <b>Alteration Frequency</b> | <b>Alteration Type</b> | <b>Alteration Count</b> |
|---------------------------------------------------------|-----------------------------|------------------------|-------------------------|
| Gastric Cancer (OncoSG,2018)                            | 0.680272                    | homdel                 | 1                       |
| Gastric Cancer (OncoSG, 2018)                           | 2.721088                    | amp                    | 4                       |
| Gastric Cancer (OncoSG, 2018)                           | 5.442177                    | mutated                | 8                       |
| Stomach Adenocarcinoma (TCGA, PanCancer Atlas)          | 0.227273                    | multiple               | 1                       |
| Stomach Adenocarcinoma (TCGA, PanCancer Atlas)          | 0.227273                    | homdel                 | 1                       |
| Stomach Adenocarcinoma (TCGA, PanCancer Atlas)          | 1.590909                    | amp                    | 7                       |
| Stomach Adenocarcinoma (TCGA, PanCancer Atlas)          | 6.363636                    | mutated                | 28                      |
| Stomach Adenocarcinoma (TCGA, Firehose Legacy)          | 0.225734                    | multiple               | 1                       |
| Stomach Adenocarcinoma (TCGA, Firehose Legacy)          | 0.225734                    | homdel                 | 1                       |
| Stomach Adenocarcinoma (TCGA, Firehose Legacy)          | 1.805869                    | amp                    | 8                       |
| Stomach Adenocarcinoma (TCGA, Firehose Legacy)          | 6.094808                    | mutated                | 27                      |
| Stomach Adenocarcinoma (TCGA, Nature 2014)              | 0.338983                    | multiple               | 1                       |
| Stomach Adenocarcinoma (TCGA, Nature 2014)              | 1.355932                    | amp                    | 4                       |
| Stomach Adenocarcinoma (TCGA, Nature 2014)              | 6.101695                    | mutated                | 18                      |
| Stomach Adenocarcinoma (Pfizer and UHK, Nat Genet 2014) | 6                           | mutated                | 6                       |
